# Supplementary material
Source: publisher figshare collection journal article supplement (https://brill.figshare.com/ndownloader/files/17434892)
Supplement: Supplementary file 1 [file 17434892]

*The Hague Journal of Diplomacy* (Vol. 15, no. 1, 2020)  
**The Mediatisation of MFAs: Diplomacy in the New Media Ecology**

*Ilan Manor*

University of Oxford, Oxford, United Kingdom

[ilan.manor@stx.ox.ac.uk](mailto:ilan.manor@stx.ox.ac.uk)

*Rhys Crille*

Research Fellow, The Open University, Milton Keynes, United Kingdom

[rhys.crilley@open.ac.uk](mailto:rhys.crilley@open.ac.uk)

Supplementary material Appendix 1 and Appendix 2 to this article can be found below.

## Appendix 1 Framing of the Gaza War

| Date             | Problem                                                                           | Cause of the problem                                                               | Moral evaluation                                                                    | Solution to the problem                                                             |
|------------------|-----------------------------------------------------------------------------------|------------------------------------------------------------------------------------|-------------------------------------------------------------------------------------|-------------------------------------------------------------------------------------|
| 29 June – 6 July | Hamas has kidnapped Israeli teenagers.                                            | Hamas is a terror organisation.                                                    | Hamas murders children.                                                             | Hamas should release kidnapped boys or pay the price.                               |
| Example Tweets   |  |  |  |  |

| 7 - 12 July    | Hamas fires rockets at Israel.                                                                                                                                                                                                                                                                                                                                                                                                                                                                                                                                                                                                                                                                                                                                                                                                                                                                                                                                                                                                                                   | Hamas is a terror organisation intent on destroying Israel.                                                                                                                                                                                                                                                                                                                                                                                                                                                    | Hamas is evil, targets civilians                                                                                                                                                                                                                                                                                                                                                                                                                                                                                                                                                                                                                                                                                                                                                                                                                                                                                                                                                                                                                                                                                                                                                                                                                                                                                                                        | Hamas is responsible for Gaza, should stop launching rockets. Israel's military operation needed to bring peace.                                                                                                                                                                                                                                                                                                                                                                                                                                                                                                                                                                                                                                                                                                                                                                                                                                                                                                                                                  |
|----------------|------------------------------------------------------------------------------------------------------------------------------------------------------------------------------------------------------------------------------------------------------------------------------------------------------------------------------------------------------------------------------------------------------------------------------------------------------------------------------------------------------------------------------------------------------------------------------------------------------------------------------------------------------------------------------------------------------------------------------------------------------------------------------------------------------------------------------------------------------------------------------------------------------------------------------------------------------------------------------------------------------------------------------------------------------------------|----------------------------------------------------------------------------------------------------------------------------------------------------------------------------------------------------------------------------------------------------------------------------------------------------------------------------------------------------------------------------------------------------------------------------------------------------------------------------------------------------------------|---------------------------------------------------------------------------------------------------------------------------------------------------------------------------------------------------------------------------------------------------------------------------------------------------------------------------------------------------------------------------------------------------------------------------------------------------------------------------------------------------------------------------------------------------------------------------------------------------------------------------------------------------------------------------------------------------------------------------------------------------------------------------------------------------------------------------------------------------------------------------------------------------------------------------------------------------------------------------------------------------------------------------------------------------------------------------------------------------------------------------------------------------------------------------------------------------------------------------------------------------------------------------------------------------------------------------------------------------------|-------------------------------------------------------------------------------------------------------------------------------------------------------------------------------------------------------------------------------------------------------------------------------------------------------------------------------------------------------------------------------------------------------------------------------------------------------------------------------------------------------------------------------------------------------------------------------------------------------------------------------------------------------------------------------------------------------------------------------------------------------------------------------------------------------------------------------------------------------------------------------------------------------------------------------------------------------------------------------------------------------------------------------------------------------------------|
| Example Tweets | <div data-bbox="215 320 651 579">  Israel Foreign Min.  @IsraelMFA <span>Following</span> <p>Since June 12, almost 200 rockets have been fired at southern Israel from #Gaza, aimed deliberately at civilians. <a href="https://mfa.gov.il/MFA/ForeignPol">mfa.gov.il/MFA/ForeignPol</a> ...</p> <p>10:20 pm · 7 Jul 2014</p> <p>24 Retweets 6 Likes</p> </div> <div data-bbox="215 635 651 1158">  Israel Foreign Min.  @IsraelMFA <span>Follow</span> <p>Photo: Rocket fired from #Gaza hits oil truck in Ashdod this morning. Injuries reported. #IsraelUnderFire</p>  <p>5:15 AM · 11 Jul 2014</p> <p>110 Retweets 21 Likes</p> </div> | <div data-bbox="701 320 1160 579">  Israel Foreign Min.  @IsraelMFA <span>Following</span> <p>Since Monday, 442 rockets have been fired at Israel from #Gaza, aimed deliberately at civilian targets <a href="https://bit.ly/1xzy31O">bit.ly/1xzy31O</a> #IsraelUnderFire</p> <p>9:14 pm · 10 Jul 2014</p> <p>53 Retweets 8 Likes</p> </div> | <div data-bbox="1245 320 1697 544">  Israel Foreign Min.  @IsraelMFA <span>Following</span> <p>Just like the #ISIS, #AlQuaeda #BokoHaram &amp; others as such, Hamas aspires to establish a violent, repressive, antisemitic Islamist state.</p> <p>2:12 am · 11 Jul 2014</p> <p>30 Retweets 5 Likes</p> </div> <div data-bbox="1245 568 1697 911">  Israel Foreign Min.  @IsraelMFA <span>Follow</span> <p>By the time you get to the end of this tweet, the 15 secs for Israelis who seek shelter under Hamas fire will be over</p> <div data-bbox="1245 703 1697 807">  <p>You Have 15 Seconds to Take Cover, Run!<br/>Imagine that you are just trying to live your life. However, terrorists constantly fire rockets at your hometown. Now imagine that you are a child. And when ...<br/><a href="https://youtube.com">youtube.com</a></p> </div> <p>11:38 AM · 7 Jul 2014</p> <p>138 Retweets 38 Likes</p> </div> | <div data-bbox="1776 320 2175 520">  Israel Foreign Min.  @IsraelMFA <span>Following</span> <p>Hamas controls the #Gaza Strip since 2007 and bears responsibility for the rocket attacks. <a href="https://mfa.gov.il/MFA/ForeignPol">mfa.gov.il/MFA/ForeignPol</a> ... #terror</p> <p>12:26 am · 8 Jul 2014</p> <p>24 Retweets 10 Likes</p> </div> <div data-bbox="1776 576 2175 807">  Israel Foreign Min.  @IsraelMFA <span>Following</span> <p>After 240 rockets were fired at Israel from #Gaza in 25 days, IDF begins Operation against Hamas <a href="https://mfa.gov.il/MFA/ForeignPol">mfa.gov.il/MFA/ForeignPol</a> ... #IsraelUnderFire</p> <p>1:51 pm · 8 Jul 2014</p> <p>86 Retweets 21 Likes</p> </div> |



|                |                                                                                                                                                                                                                                                                                                                                                                                                                                                                                                                                                                                                                                                                                                                                                                                                                                                                                                                                    |                                                                                                                                                                                                                                                                                                                                                                                                                                                                                                                                                                                                                                                                                                                                                                                                                                                                                                                 |                                                                                                                                                                                                                                                                                                                                                                                                                                                                                                                                                                                                                                                                                                                                                                                                                                                                                                                                                                                                                                                                                                                                                                                                                                                                                     |                                                                                                                                                                                                                                                                                                                                                                                                                                                                                                                                                                                                                                                                                                                                                                                                                                                                                   |
|----------------|------------------------------------------------------------------------------------------------------------------------------------------------------------------------------------------------------------------------------------------------------------------------------------------------------------------------------------------------------------------------------------------------------------------------------------------------------------------------------------------------------------------------------------------------------------------------------------------------------------------------------------------------------------------------------------------------------------------------------------------------------------------------------------------------------------------------------------------------------------------------------------------------------------------------------------|-----------------------------------------------------------------------------------------------------------------------------------------------------------------------------------------------------------------------------------------------------------------------------------------------------------------------------------------------------------------------------------------------------------------------------------------------------------------------------------------------------------------------------------------------------------------------------------------------------------------------------------------------------------------------------------------------------------------------------------------------------------------------------------------------------------------------------------------------------------------------------------------------------------------|-------------------------------------------------------------------------------------------------------------------------------------------------------------------------------------------------------------------------------------------------------------------------------------------------------------------------------------------------------------------------------------------------------------------------------------------------------------------------------------------------------------------------------------------------------------------------------------------------------------------------------------------------------------------------------------------------------------------------------------------------------------------------------------------------------------------------------------------------------------------------------------------------------------------------------------------------------------------------------------------------------------------------------------------------------------------------------------------------------------------------------------------------------------------------------------------------------------------------------------------------------------------------------------|-----------------------------------------------------------------------------------------------------------------------------------------------------------------------------------------------------------------------------------------------------------------------------------------------------------------------------------------------------------------------------------------------------------------------------------------------------------------------------------------------------------------------------------------------------------------------------------------------------------------------------------------------------------------------------------------------------------------------------------------------------------------------------------------------------------------------------------------------------------------------------------|
| 17 July        | <p>Hamas is a powerful military organisation and is infiltrating Israel through tunnels. Hamas is rejecting ceasefire.</p>                                                                                                                                                                                                                                                                                                                                                                                                                                                                                                                                                                                                                                                                                                                                                                                                         | <p>Hamas is a terror organisation.</p>                                                                                                                                                                                                                                                                                                                                                                                                                                                                                                                                                                                                                                                                                                                                                                                                                                                                          | <p>Hamas uses people as human shields whilst Israel opens a humanitarian window with the UN.</p>                                                                                                                                                                                                                                                                                                                                                                                                                                                                                                                                                                                                                                                                                                                                                                                                                                                                                                                                                                                                                                                                                                                                                                                    | <p>A ground operation in order to restore peace and destroy tunnels.</p>                                                                                                                                                                                                                                                                                                                                                                                                                                                                                                                                                                                                                                                                                                                                                                                                          |
| Example Tweets | <div data-bbox="212 359 645 582">  Israel Foreign Min. <a href="#">@IsraelMFA</a> <span>Following</span><br/> <p>This morning, IDF forces thwarted an attack by Hamas terrorists attempting to infiltrate Israel via a <a href="#">#terror tunnel</a> <a href="#">bit.ly/1nzAbi8</a></p> <p>8:58 pm · 17 Jul 2014</p> <p>25 Retweets 8 Likes</p> </div> <div data-bbox="212 606 566 1173">  Israel Foreign Min. <a href="#">@IsraelMFA</a> <span>Follow</span><br/> <p>Within 9 days, 1377 (!) rockets were fired from <a href="#">#Gaza</a> at Israel. <a href="#">#IsraelUnderFire</a> Please retweet.</p>  <p>11:37 PM · 16 Jul 2014</p> <p>90 Retweets 23 Likes</p> </div> | <div data-bbox="698 359 1176 582">  Israel Foreign Min. <a href="#">@IsraelMFA</a> <span>Following</span><br/> <p>Partners in <a href="#">#terror</a>: Expressions of support in the <a href="#">#Gaza</a> Strip for the Islamic State in Iraq and Al-Sham (<a href="#">#ISIS</a>) <a href="#">bit.ly/Ue2nR0</a></p> <p>10:32 pm · 17 Jul 2014</p> <p>32 Retweets 8 Likes</p> </div> <div data-bbox="698 606 1176 885">  Israel Foreign Min. <a href="#">@IsraelMFA</a> <span>Following</span><br/> <p>In light of Hamas' criminal aggression &amp; the dangerous attempt to infiltrate Israeli territory, Israel must act to defend its citizens. <a href="#">#Gaza</a></p> <p>12:05 am · 18 Jul 2014</p> <p>46 Retweets 24 Likes</p> </div> | <div data-bbox="1245 359 1702 678">  Israel Foreign Min. <a href="#">@IsraelMFA</a> <span>Following</span><br/> <p>While Israel protects civilians from rockets Hamas uses civilians to protect their rockets.</p>  <p>4:15 pm · 17 Jul 2014</p> <p>43 Retweets 16 Likes</p> </div> <div data-bbox="1245 742 1702 1236">  Israel Foreign Min. <a href="#">@IsraelMFA</a> <span>Follow</span><br/> <p>As a result of dialogue between the IDF &amp; the UN, IDF enables a humanitarian window in <a href="#">#Gaza</a> coming into effect now (10:00) until 15:00.</p> <p>12:10 AM · 17 Jul 2014</p> <p>39 Retweets 9 Likes</p>  Israel Foreign Min. <a href="#">@IsraelMFA</a> <span>Follow</span><br/> <p>During this time, the IDF will hold its fire in <a href="#">#Gaza</a>. This humanitarian window is meant to allow civilians to resupply needed goods.</p> <p>12:22 AM · 17 Jul 2014</p> <p>27 Retweets 10 Likes</p> </div> | <div data-bbox="1774 359 2161 550">  Israel Foreign Min. <a href="#">@IsraelMFA</a> <span>Following</span><br/> <p>IDF begins ground operation in <a href="#">#Gaza</a>, targeting Hamas' <a href="#">#terror</a> tunnels that enable terrorists to infiltrate Israel &amp; carry out attacks.</p> <p>11:01 pm · 17 Jul 2014</p> <p>108 Retweets 36 Likes</p> </div> <div data-bbox="1774 598 2161 821">  Israel Foreign Min. <a href="#">@IsraelMFA</a> <span>Following</span><br/> <p>Decision for ground action came after Israel accepted Egyptian cease-fire proposal &amp; its rejection by Hamas which continued firing rockets</p> <p>11:50 pm · 17 Jul 2014</p> <p>94 Retweets 31 Likes</p> </div> |

| 18 – 19 July   | Hamas attacks from the sky with rockets and from below with tunnels.                                                                                                                                                                                                                                                                                                                                                                                                                                                                                                                                                                                                                                                                                                                                                                                                                                                                                                                                                                                                                                                                             | Hamas's main objective is to destroy Israel and kill Jews.                                                                                                                                                                                                                                                                                                                                                                                                                                                                                                                                                                                                                                   | Hamas is using tunnels to massacre Israelis and firing rockets from civilian areas.                                                                                                                                                                                                                                         | A ground operation because the air force alone cannot destroy tunnels                                                                                                                                                                                                                                                                                                                                                                                                                                                                                                                                                                                                                                                                                                                                                                                                                                                                                                                                             |
|----------------|--------------------------------------------------------------------------------------------------------------------------------------------------------------------------------------------------------------------------------------------------------------------------------------------------------------------------------------------------------------------------------------------------------------------------------------------------------------------------------------------------------------------------------------------------------------------------------------------------------------------------------------------------------------------------------------------------------------------------------------------------------------------------------------------------------------------------------------------------------------------------------------------------------------------------------------------------------------------------------------------------------------------------------------------------------------------------------------------------------------------------------------------------|----------------------------------------------------------------------------------------------------------------------------------------------------------------------------------------------------------------------------------------------------------------------------------------------------------------------------------------------------------------------------------------------------------------------------------------------------------------------------------------------------------------------------------------------------------------------------------------------------------------------------------------------------------------------------------------------|-----------------------------------------------------------------------------------------------------------------------------------------------------------------------------------------------------------------------------------------------------------------------------------------------------------------------------|-------------------------------------------------------------------------------------------------------------------------------------------------------------------------------------------------------------------------------------------------------------------------------------------------------------------------------------------------------------------------------------------------------------------------------------------------------------------------------------------------------------------------------------------------------------------------------------------------------------------------------------------------------------------------------------------------------------------------------------------------------------------------------------------------------------------------------------------------------------------------------------------------------------------------------------------------------------------------------------------------------------------|
| Example Tweets | <p><b>Israel Foreign Min.</b> <a href="#">@IsraelMFA</a> <span>Following</span></p> <p>The tunnels #Hamas digs underground are used by it to infiltrate into Israel in order to commit acts of #terrorism</p>  <p><b>Hamas underground tunnels for terror</b><br/>The tunnels Hamas digs underground are used for infiltration into Israel in order to commit terrorism acts against civilians.<br/>youtube.com</p> <p>11:35 am · 18 Jul 2014</p> <p>39 Retweets 11 Likes</p> <p>7 39 11</p> <p><b>Israel Foreign Min.</b> <a href="#">@IsraelMFA</a> <span>Follow</span></p> <p>This evening in Israel, sirens sounded in 76 cities &amp; villages following rockets fired from #Gaza. #IsraelUnderFire</p>  <p>ISRAEL, RED ALERT<br/>JULY 17 17:59</p> <p>HAMAS launches rockets at Israeli civilians - Israelis at 76 cities and villages are in shelters.</p> <p>Israel must defend itself</p> <p>5:29 PM · 17 Jul 2014</p> <p>142 Retweets 33 Likes</p> <p>18 142 33</p> | <p><b>Israel Foreign Min.</b> <a href="#">@IsraelMFA</a> <span>Following</span></p> <p>Hamas made it clear that its main objective is the destruction of the State of Israel &amp; the Jewish people <a href="#">buff.ly/1u0oria</a> @washtimes</p>  <p><b>AHARONI: The most dangerous weapon in Gaza</b><br/>There is nowhere left for us to go. Israelis from Eilat to Haifa have heard the red alerts blast as Hamas has indiscriminately launched more than one thousand rockets at our cities over the last few w<br/>washingtontimes.com</p> <p>1:03 am · 19 Jul 2014</p> <p>59 Retweets 22 Likes</p> | <p><b>Israel Foreign Min.</b> <a href="#">@IsraelMFA</a> <span>Follow</span></p> <p>As of last night, The IDF uncovered 8 tunnel access points in #Gaza.</p>  <p>6:34 AM · 18 Jul 2014</p> <p>131 Retweets 46 Likes</p> <p>14 131 46</p> | <p><b>Israel Foreign Min.</b> <a href="#">@IsraelMFA</a> <span>Following</span></p> <p>The Hamas tunnel industry, targeted by the IDF, is used for terrorist attacks on Israeli territory <a href="#">bit.ly/1lbECzV</a> #Gaza</p> <p>4:02 pm · 18 Jul 2014</p> <p>33 Retweets 10 Likes</p> <p>8 33 10</p> <p><b>Israel Foreign Min.</b> <a href="#">@IsraelMFA</a> <span>Following</span></p> <p>In order to disable such capabilities &amp; eliminate the possible threat, the IDF will continue on its course of action. #IsraelUnderFire #Gaza</p> <p>5:15 pm · 18 Jul 2014</p> <p>23 Retweets 14 Likes</p> <p>7 23 14</p> <p><b>Israel Foreign Min.</b> <a href="#">@IsraelMFA</a> <span>Following</span></p> <p>Exposing Hamas' #terror tunnels in #Gaza by IDF ground action means blocking Hamas' major gateway to terror in Israel</p>  <p><b>Blocking Hamas' Gateway to Terror</b></p> <p>8:31 pm · 18 Jul 2014</p> |



| 20-22 July     | There is a high death toll in Gaza.                                                                                                                                                                                                                                                                                                                                                                                                                                                                                                      | Hamas uses Gazans as human shields.                                                                                                                                                                                                                                                                                                                                                                                                                                                                                                                                                                                                                                                                                                                                                                                                                                                                                                                                                                                                                                                                                                                                                                                                                                                                                                                                                                                                                                                                | Israel regrets the loss of life and Hamas puts civilians directly in the line of fire.                                                                                                                                                                                                                                                                                                                                                                                                                                                                                                                                                                                                                                                                                                                                                                                                            | Humanitarian ceasefire and Gazans should leave homes after IDF warnings.                                                                                                                                                                                                                                                                                                                                                                                                                                                                                                                                                                                                                                                                                                                                                                                                                                                                                                                                                                                                                                                                                                                                                                                                                                                                                                                                                                                                                                                                                      |
|----------------|------------------------------------------------------------------------------------------------------------------------------------------------------------------------------------------------------------------------------------------------------------------------------------------------------------------------------------------------------------------------------------------------------------------------------------------------------------------------------------------------------------------------------------------|----------------------------------------------------------------------------------------------------------------------------------------------------------------------------------------------------------------------------------------------------------------------------------------------------------------------------------------------------------------------------------------------------------------------------------------------------------------------------------------------------------------------------------------------------------------------------------------------------------------------------------------------------------------------------------------------------------------------------------------------------------------------------------------------------------------------------------------------------------------------------------------------------------------------------------------------------------------------------------------------------------------------------------------------------------------------------------------------------------------------------------------------------------------------------------------------------------------------------------------------------------------------------------------------------------------------------------------------------------------------------------------------------------------------------------------------------------------------------------------------------|---------------------------------------------------------------------------------------------------------------------------------------------------------------------------------------------------------------------------------------------------------------------------------------------------------------------------------------------------------------------------------------------------------------------------------------------------------------------------------------------------------------------------------------------------------------------------------------------------------------------------------------------------------------------------------------------------------------------------------------------------------------------------------------------------------------------------------------------------------------------------------------------------|---------------------------------------------------------------------------------------------------------------------------------------------------------------------------------------------------------------------------------------------------------------------------------------------------------------------------------------------------------------------------------------------------------------------------------------------------------------------------------------------------------------------------------------------------------------------------------------------------------------------------------------------------------------------------------------------------------------------------------------------------------------------------------------------------------------------------------------------------------------------------------------------------------------------------------------------------------------------------------------------------------------------------------------------------------------------------------------------------------------------------------------------------------------------------------------------------------------------------------------------------------------------------------------------------------------------------------------------------------------------------------------------------------------------------------------------------------------------------------------------------------------------------------------------------------------|
| Example Tweets | <div data-bbox="212 279 645 526">  Israel Foreign Min.  @IsraelMFA <span>Follow</span> <p>While the IDF does all it can to avoid civilian casualties, Hamas deliberately puts lives of #Gaza civilians in danger<br/><a href="https://youtu.be/uzEgIhFKI8">youtu.be/uzEgIhFKI8</a></p> <p>5:38 AM · 20 Jul 2014</p> <p>35 Retweets 17 Likes</p> <p>12 35 17</p> </div> | <div data-bbox="698 279 1176 694">  Israel Foreign Min.  @IsraelMFA <span>Following</span> <p>Hamas uses teens in #Gaza as human shields:   Hamas: We Will Give Hand -Grenades to Our Youth<br/><a href="https://youtube.com/watch?v=I_UbLH...">youtube.com/watch?v=I_UbLH ...</a><br/>#IsraelUnderFire</p> <div data-bbox="698 475 1176 582">  <p><b>Hamas: We Will Give Hand -Grenades to Our Youth</b><br/>Hamas' Spokesman, aired on Al-Aqsa TV, July 18, 2014, 22:30. Our military industry manufactured 250,000 hand-grenades which we will give to our youth in orde...<br/><a href="https://youtube.com">youtube.com</a></p> </div> <p>9:40 am · 20 Jul 2014</p> <p>61 Retweets 5 Likes</p> <p>8 61 5</p> </div> <div data-bbox="698 718 1176 965">  Israel Foreign Min.  @IsraelMFA <span>Follow</span> <p>What is the safest hiding place for an armed #terrorist in #Gaza? An #ambulance.<br/><a href="https://youtu.be/a9iiyhoGK08">youtu.be/a9iiyhoGK08</a> #IsraelUnderFire</p> <p>6:23 AM · 20 Jul 2014</p> <p>55 Retweets 11 Likes</p> <p>12 55 11</p> </div> | <div data-bbox="1243 279 1691 614">  Israel Foreign Min.  @IsraelMFA <span>Following</span> <p>While the IDF does all it can to avoid civilian casualties, Hamas deliberately puts lives of #Gaza civilians in danger</p> <div data-bbox="1243 411 1691 518">  <p><b>Hamas: We Place Civilians in the Line of Fire</b><br/>While the IDF does everything that it can to avoid civilian casualties, Hamas deliberately puts Palestinian civilian lives in danger. Hamas hides weapons and...<br/><a href="https://youtube.com">youtube.com</a></p> </div> <p>3:38 pm · 20 Jul 2014</p> <p>35 Retweets 17 Likes</p> <p>12 35 17</p> </div> | <div data-bbox="1758 279 2172 502">  Israel Foreign Min.  @IsraelMFA <span>Following</span> <p>IDF will establish a field hospital at Erez Crossing today to supply #medical assistance &amp; humanitarian care to Palestinians from #Gaza.</p> <p>1:19 pm · 20 Jul 2014</p> <p>40 Retweets 15 Likes</p> <p>16 40 15</p> </div> <div data-bbox="1758 526 2172 726">  Israel Foreign Min.  @IsraelMFA <span>Following</span> <p>The IDF has authorized a #humanitarian window to evacuate injured Palestinians from Shuja'iyya in #Gaza between 13:30-15:30</p> <p>1:59 pm · 20 Jul 2014</p> <p>28 Retweets 12 Likes</p> <p>4 28 12</p> </div> <div data-bbox="1758 750 2172 1189">  Israel Foreign Min.  @IsraelMFA <span>Follow</span> <p>Photo: Humanitarian Aid continues to be transferred into the #Gaza Strip.</p> <div data-bbox="1758 837 2172 1093">  </div> <p>8:46 AM · 20 Jul 2014</p> <p>123 Retweets 34 Likes</p> <p>22 123 34</p> </div> |

|                |                                                                                                                                                                      |                                                                                     |                                                                                               |                                                                                     |
|----------------|----------------------------------------------------------------------------------------------------------------------------------------------------------------------|-------------------------------------------------------------------------------------|-----------------------------------------------------------------------------------------------|-------------------------------------------------------------------------------------|
| 23 July        | The UN condemns Israel but not Hamas.                                                                                                                                | International double standards.                                                     | Israel condemns terror.                                                                       | Israel rejects UNHRC decision                                                       |
| Example Tweets |                                                                                     |   |            |  |
| 24 - 26 July   | Hamas Rockets threaten 6 million Israelis all across Israel.                                                                                                         | Hamas is a terror organisation.                                                     | Hamas uses people as human shields whilst Israel provides aid and avoids civilian casualties. | Military operation, disarming Hamas, and a new government in Gaza.                  |
| Example Tweets |   |  |            |  |



|              |                                            |                                    |                                                                                                                                                                                                                                                                                                                                                                                 |                                                                                                                                                                                                                                                                                                                                                                                                                                                                                      |
|--------------|--------------------------------------------|------------------------------------|---------------------------------------------------------------------------------------------------------------------------------------------------------------------------------------------------------------------------------------------------------------------------------------------------------------------------------------------------------------------------------|--------------------------------------------------------------------------------------------------------------------------------------------------------------------------------------------------------------------------------------------------------------------------------------------------------------------------------------------------------------------------------------------------------------------------------------------------------------------------------------|
|              |                                            |                                    |  Israel Foreign Min. <span>✓</span><br>@IsraelMFA <span>Following</span> <p>Field hospital for wounded Palestinians from #Gaza, maintained by IDF &amp; Red Crescent, continues to receive patients.</p>  |  Israel Foreign Min. <span>✓</span><br>@IsraelMFA <span>Following</span> <p>The main objective of Operation Protective Edge is to restore quiet to Israel's citizens. <a href="https://bit.ly/1AbvFk7">bit.ly/1AbvFk7</a> #Gaza #IsraelUnderFire</p> <p>9:37 pm · 24 Jul 2014</p> <p>28 Retweets 13 Likes</p>  |
| 27 - 29 July | Hamas endangers the lives of Palestinians. | Hamas are radical fundamentalists. | Hamas spends aid money on terror and uses Gazans as human shields whilst Israel provides aid and avoids civilian casualties                                                                                                                                                                                                                                                     | Save the Palestinians from Hamas and demilitarise Gaza.                                                                                                                                                                                                                                                                                                                                                                                                                              |

## Example Tweets

**Israel Foreign Min.** @IsraelMFA Following

Hamas human shields are to blame, not Israel - @COLRICHARDKEMP thetim.es/1nZeu6S via @TheTimes #Gaza #IsraelUnderFire

Hamas human shields are to blame, not Israel  
"The Israelis are doing it all wrong. The RAF didn't fly off to bomb Belfast in the troubles." These words from a respected media commentator embody the extraordinary lack of understanding by...  
thetimes.co.uk

3:09 am - 27 Jul 2014

57 Retweets 24 Likes

**Israel Foreign Min.** @IsraelMFA Follow

Son of Hamas Founder: "Hamas does not care about the lives of Palestinians."  
youtu.be/KakxXN5Z-XI #Gaza #GazaUnderAttack #IsraelUnderFire

Mosab Hassan Yousef (Son of Hamas Founder) tells the truth about how Hamas Terror group aims to kill civilians and uses Palestinian Children as human shield...  
youtube.com

11:27 PM - 27 Jul 2014

180 Retweets 57 Likes

**Israel Foreign Min.** @IsraelMFA Following

Hamas - a #terror organization that sacrifices the lives of the people of #Gaza.

Hamas' favorite spots: schools, hospitals & cemeteries  
http://bit.ly/1AbvFk7 Where does Hamas like to operate? Where do its terrorists place their firing positions and rocket launchers? In places normal people ho...  
youtube.com

12:01 pm - 28 Jul 2014

43 Retweets 21 Likes

**Israel Foreign Min.** @IsraelMFA Following

Hamas part of global Islamic #terrorism, which poses a threat to #security worldwide  
bit.ly/1k3wK8w

3:02 pm - 28 Jul 2014

42 Retweets 19 Likes

**Israel Foreign Min.** @IsraelMFA Follow

Weekend #report on the ongoing passage of goods & humanitarian aid into #Gaza.

10:00 AM Operation "Protective Edge"

A 12 hour ceasefire for humanitarian aid from 6 AM to 6 PM on Saturday (26-7). This window prohibited the deployment of civilians to help move aid trucks and the CC&A to coordinate UN humanitarian experts. Israel extended the period for 4 hours, however, Hamas resumed attacks shortly after 6 PM.

In order to coordinate breakdown of the field hospitals, all personnel should be observed to the extent possible.

If you or an official wish to observe humanitarian aid trucks in the West Bank, please contact Yotam Hershko (yotam@hershko.com) or the Israel-Palestine Energy Authority to request the presence of the Israel-Palestine Energy Authority.

**Erez Crossing**  
A total of 18 patients were treated at the field hospital. 11 were sent for further care in Israel.

**Kerem Shalom**  
Total of 1,154 trucks entered via Kerem Shalom.

**Infrastructure**  
During the 12 hour humanitarian window on Saturday, COGAT worked in close coordination with the IC and Palestinian Energy Authority to repair the electrical feeder lines that had been damaged or had been overloaded. 4 of the 10 lines were functioning as of Friday night, although 3 repairs failed to hold.

Current use are working to fix 4 electrical, 3 water, 1 sewage and 1 telecommunications problems.

43 Infrastructure repairs total

22 electrical repairs

14 water supply repairs

4 sewage repairs

1,444 Total Entries into Israel  
1,200 Total Exit to Gaza

Total Energy Impact to Gaza  
4.11 million kWh of diesel for the power station. 3444 kWh for UNRWA.

2.64 million liters of fuel and 550K kWh of electricity for transportation.

1,431 tons of gas for domestic use.

July 28

247K liters for transportation

217K liters of diesel for the

5:02 AM - 28 Jul 2014

65 Retweets 19 Likes

**Israel Foreign Min.** @IsraelMFA Following

Instead of investing money in the #children of #Gaza, Hamas builds terror tunnels and buys more weapons.

SAVE THE CHILDREN OF GAZA FROM HAMAS  
SAVE THE CHILDREN OF GAZA FROM HAMAS  
youtube.com

8:56 pm - 27 Jul 2014

70 Retweets 16 Likes

**Israel Foreign Min.** @IsraelMFA Following

Hamas threatening journalists in #Gaza who expose abuse of civilians toi.sr/1rqJqFI via @timesofisrael #FreeGazaFromHamas

Hamas threatening journalists in Gaza who expose abuse of civilians  
Reporters are bullied, have equipment confiscated, barred from sensitive sites... but they don't report it. 'They're too scared,' says Israeli official, lamenting capitulation t...  
timesofisrael.com

Instead of investing money in the #children of #Gaza, Hamas builds terror tunnels and buys more weapons.

SAVE THE CHILDREN OF GAZA FROM HAMAS

MORE VIDEOS

0:09 / 1:21

YouTube

30 July – 5 August

Hamas violates ceasefire

Hamas are radical fundamentalists.

Hamas is barbaric.

Ceasefire, demilitarise Gaza with the support of other states.

Example  
Tweets

**Israel Foreign Min.** @IsraelMFA Following

Since it's hard to keep up with Hamas' ceasefire violations - here's a [#chronology](#) of them. [bit.ly/1u3hLMI](#) #Gaza

6:26 pm · 31 Jul 2014

63 Retweets 26 Likes

19 63 26

**Israel Foreign Min.** @IsraelMFA Follow

After the ceasefire came into effect this morning, Hamas terrorists killed 2 IDF soldiers during the suspected kidnapping of an IDF officer

6:27 AM · 1 Aug 2014

88 Retweets 17 Likes

22 88 17

**Israel Foreign Min.** @IsraelMFA Following

Hamas has turned #Gaza into a terrorist fortress, both above and below ground. [bit.ly/1jPd20v](#)

1:50 pm · 31 Jul 2014

43 Retweets 21 Likes

16 43 21

**Israel Foreign Min.** @IsraelMFA Following

Hamas official, Ismail Radwan, praises Palestinians in #Gaza for sacrificing woman, #children & elderly.

[Hamas Official Praises Palestinians in Gaza for Sacrificing ...](#)  
Hamas official, Ismail Radwan, praises Palestinians in Gaza for sacrificing woman, children and elderly. He congratulates them for "re-drawing the map of the..."  
[youtube.com](#)

8:20 am · 3 Aug 2014

96 Retweets 27 Likes

15 96 27

**Israel Foreign Min.** @IsraelMFA Following

Tunnels Lead Right to the Heart of Israeli [#Fear nyti.ms/1IPEHtv](#) via @nytimes #Gaza

[Tunnels Lead Right to the Heart of Israeli Fear](#)  
The sophistication and extent of the underground passages used by Hamas to infiltrate Israel from Gaza has stiffened Israeli resolve to destroy them.  
[nytimes.com](#)

7:50 am · 30 Jul 2014

47 Retweets 10 Likes

11 47 10

**Israel Foreign Min.** @IsraelMFA Follow

US condemns 'barbaric' Hamas ceasefire breach,blames Hamas for breakdown of ceasefire w/ Israel [goo.gl/ecazNv](#) via @TimesLIVE #Gaza

[TimesLIVE](#)  
TimesLIVE  
[timeslive.co.za](#)

9:06 AM · 1 Aug 2014

47 Retweets 12 Likes

16 47 12

**Israel Foreign Min.** @IsraelMFA Following

Arab Leaders, Viewing Hamas as Worse Than Israel, Stay Silent [nyti.ms/1o540vU](#) #Gaza #GazaUnderAttack

[Arab Leaders, Viewing Hamas as Worse Than Israel, Stay S...](#)  
Led by Egypt, a coalition of Arab states has effectively lined up with Israel in its fight against Hamas, posing new obstacles to efforts to end the Gaza conflict.  
[nytimes.com](#)

12:48 pm · 31 Jul 2014

37 Retweets 14 Likes

4 37 14

**Israel Foreign Min.** @IsraelMFA Following

PM Netanyahu: US & European support of the need to demilitarize terrorist orgs is an important achievement for Israel [bit.ly/1p1uij](#)

9:26 am · 3 Aug 2014

44 Retweets 13 Likes

9 44 13

6 – 7  
August

Hamas is committed to radical Islam and terror.

Global Islamic extremism.

Israel is at the forefront of the struggle between democracy and radicalism.

Ceasefire that Israel has agreed to.

Example  
Tweets

**Israel Foreign Min.** @IsraelMFA Following

.@IsraelinUN's Amb. Prosor: Israel is on the #Frontline of the War Against Radical #Extremism

[Prosor to the General Assembly: Israel is on the Frontline o...](#)  
Israel ambassador to the UN, Ron Prosor, addressed the UN's General Assembly following operation Protective Edge. Prosor: "The international community is onc..."  
[youtube.com](#)

12:17 am · 8 Aug 2014

24 Retweets 11 Likes

6 24 11

**Israel Foreign Min.** @IsraelMFA Following

Hamas & the terror orgs in #Gaza demonstrate yet again that they are committed to terror & violence over any attempt to resolve the conflict

11:20 am · 8 Aug 2014

52 Retweets 13 Likes

16 52 13

**Israel Foreign Min.** @IsraelMFA Following

.@IsraelinUN's Amb. Prosor: Israel is on the #Frontline of the War Against Radical #Extremism

[Prosor to the General Assembly: Israel is on the Frontline o...](#)  
Israel ambassador to the UN, Ron Prosor, addressed the UN's General Assembly following operation Protective Edge. Prosor: "The international community is onc..."  
[youtube.com](#)

12:17 am · 8 Aug 2014

24 Retweets 11 Likes

6 24 11

**Israel Foreign Min.** @IsraelMFA Following

The 72-hour ceasefire between Israel & Hamas is holding as it enters its second day, All IDF forces are out of #Gaza. [bit.ly/1xzy31O](#)

12:33 pm · 6 Aug 2014

33 Retweets 15 Likes

3 33 15

|              |                                                                                                                                                                                                                                                                                                                                              |                                                                                                                                                                                                                                                                                                                                                                 |                                                                                                                                                                                                                                                                                                                                                                                                                                                                                                                                                                                                     |                                                                                                                                                                                                                                                                                                                                                                                                                                                                                                                                                                                                                                                     |
|--------------|----------------------------------------------------------------------------------------------------------------------------------------------------------------------------------------------------------------------------------------------------------------------------------------------------------------------------------------------|-----------------------------------------------------------------------------------------------------------------------------------------------------------------------------------------------------------------------------------------------------------------------------------------------------------------------------------------------------------------|-----------------------------------------------------------------------------------------------------------------------------------------------------------------------------------------------------------------------------------------------------------------------------------------------------------------------------------------------------------------------------------------------------------------------------------------------------------------------------------------------------------------------------------------------------------------------------------------------------|-----------------------------------------------------------------------------------------------------------------------------------------------------------------------------------------------------------------------------------------------------------------------------------------------------------------------------------------------------------------------------------------------------------------------------------------------------------------------------------------------------------------------------------------------------------------------------------------------------------------------------------------------------|
| 8-14 August  | <p>Hamas violates ceasefire.</p> <p><b>Example Tweets</b></p> <p><b>Israel Foreign Min.</b> @IsraelMFA <span>Following</span></p> <p>This morning, with the ceasefire still in effect, rockets were fired at Israel from #Gaza by terrorists.</p>           | <p>Hamas is addicted to terror and uses Gazans as human shields.</p> <p><b>Israel Foreign Min.</b> @IsraelMFA <span>Following</span></p> <p>Hamas is addicted to terror &amp; is responsible for taking the lives of civilians in #Gaza &amp; Israel. #FreeGazaFromHamas</p>  | <p>Hamas uses Gazans as human shields.</p> <p><b>Israel Foreign Min.</b> @IsraelMFA <span>Follow</span></p> <p>Hamas could have chosen peace. Instead, it made #Gaza suffer. <a href="http://wapo.st/1u7bOkL">wapo.st/1u7bOkL</a> via @washingtonpost</p>  <p>Hamas could have chosen peace. Instead, it made Gaza suffer. The group squandered opportunities after Israel's withdrawal. <a href="http://washingtonpost.com">washingtonpost.com</a></p> <p>6:02 AM - 11 Aug 2014</p> <p>25 Retweets 10 Likes</p> | <p>Ceasefire, eliminate Hamas and demilitarise Gaza.</p> <p><b>Israel Foreign Min.</b> @IsraelMFA <span>Following</span></p> <p>#Gaza's demilitarization is important both for Israel and for the residents of Gaza and their future safety &amp; prosperity.</p> <p>11:59 pm - 14 Aug 2014</p> <p>57 Retweets 40 Likes</p> <p><b>Israel Foreign Min.</b> @IsraelMFA <span>Follow</span></p> <p>Despite the firing of eight rockets from #Gaza last night, the ceasefire has been extended for five days. <a href="http://mfa.gov.il/MFA/ForeignPol">mfa.gov.il/MFA/ForeignPol</a> ...</p> <p>6:52 AM - 14 Aug 2014</p> <p>53 Retweets 15 Likes</p> |
| 15-18 August | <p>Hamas violates ceasefire.</p> <p><b>Example Tweets</b></p> <p><b>Israel Foreign Min.</b> @IsraelMFA <span>Following</span></p> <p>Israel will continue its efforts to transfer humanitarian aid into #Gaza, provided the border crossings are not attacked by Hamas rockets</p> <p>10:16 am - 15 Aug 2014</p> <p>34 Retweets 12 Likes</p> | <p>Hamas is addicted to terror</p> <p><b>Israel Foreign Min.</b> @IsraelMFA <span>Following</span></p> <p>Hamas has much in common with #ISIS, #AlQuaeda &amp; Boko Haram. They're all part of the challenge posed to the democratic world, including Israel</p> <p>12:00 pm - 15 Aug 2014</p> <p>91 Retweets 44 Likes</p>                                      | <p>Israel helps wounded Gazans</p> <p><b>Israel Foreign Min.</b> @IsraelMFA <span>Following</span></p> <p>Israel continuously works to transfer the ill &amp; the wounded from #Gaza for medical treatment in Israel &amp; abroad. <a href="http://bit.ly/1rbOTUZ">bit.ly/1rbOTUZ</a></p> <p>11:05 am - 15 Aug 2014</p> <p>43 Retweets 20 Likes</p>                                                                                                                                                                                                                                                 | <p>Ceasefire.</p> <p><b>Israel Foreign Min.</b> @IsraelMFA <span>Following</span></p> <p>Israel, like the EU FAC attributes great importance to the Egyptian initiative to achieve a stable, durable ceasefire. <a href="http://bit.ly/1taD3aq">bit.ly/1taD3aq</a></p> <p>12:13 pm - 17 Aug 2014</p> <p>15 Retweets 6 Likes</p>                                                                                                                                                                                                                                                                                                                     |

|                |                                                                                   |                                                                                    |                                                                                     |                                                                                                                                                                                 |
|----------------|-----------------------------------------------------------------------------------|------------------------------------------------------------------------------------|-------------------------------------------------------------------------------------|---------------------------------------------------------------------------------------------------------------------------------------------------------------------------------|
| 19 – 27 August | <p>Hamas violates ceasefire.</p>                                                  | <p>Hamas are radical fundamentalists and keep breaking ceasefire.</p>              | <p>Hamas ‘is all about hatred, violence and #terror’</p>                            | <p>Ceasefire, long term Israeli security and destruction of Hamas infrastructure. Israel accepts ceasefire and Hamas eventually does because of Israel’s military pressure.</p> |
| Example Tweets |  |  |  |                                                                                              |



## Appendix 2      Subject Matter Categories

| Category                 | Content                                                                                                                                                                                                                                                                    | Example # 1                                                                         | Example # 2                                                                          |
|--------------------------|----------------------------------------------------------------------------------------------------------------------------------------------------------------------------------------------------------------------------------------------------------------------------|-------------------------------------------------------------------------------------|--------------------------------------------------------------------------------------|
| Evil Character of Hamas  | Tweets that dealt with Hamas' investment in terror infrastructure, disregard for lives of civilians, association with ISIS and Boko Haram, use of child soldiers, firing on Israeli aid convoys, committing war crimes and committing summary executions in the Gaza strip |   |   |
| Rocket Fire at Civilians | Tweets that depicted damage caused from Hamas rockets, detailed the number of rockets fired, the range of rockets and the targeting of Israeli civilians and cities                                                                                                        |  |  |



| Category               | Content                                                                                                                                                                                                | Example # 1                                                                                                                                                                                                                                                                                                                                                                                                                                                                                                                                                                                                                                                                                                                                                                                                                                                                                                                                                                                                                                                                                                                                                                                                                                                                                                                                                                                                                                                                                                                                                                                                                                                                                                                                                                                                                                                                                                        | Example # 2 |
|------------------------|--------------------------------------------------------------------------------------------------------------------------------------------------------------------------------------------------------|--------------------------------------------------------------------------------------------------------------------------------------------------------------------------------------------------------------------------------------------------------------------------------------------------------------------------------------------------------------------------------------------------------------------------------------------------------------------------------------------------------------------------------------------------------------------------------------------------------------------------------------------------------------------------------------------------------------------------------------------------------------------------------------------------------------------------------------------------------------------------------------------------------------------------------------------------------------------------------------------------------------------------------------------------------------------------------------------------------------------------------------------------------------------------------------------------------------------------------------------------------------------------------------------------------------------------------------------------------------------------------------------------------------------------------------------------------------------------------------------------------------------------------------------------------------------------------------------------------------------------------------------------------------------------------------------------------------------------------------------------------------------------------------------------------------------------------------------------------------------------------------------------------------------|-------------|
| Right to Defend Israel | Tweets demonstrating the threat posed to Israeli citizens from Hamas rockets, Hamas terror tunnels, Hamas operatives infiltrating Israel and Israelis need to find shelter from rockets within seconds | <div><div><div><div><div></div><div>Israel Foreign Min. </div></div><div><div>@IsraelMFA</div><div><div>Follow</div><div></div></div></div></div><div><p>These children have only 15 seconds to save their lives. Watch:</p><div><div></div><div><p>You Have 15 Seconds to Take Cover, Run!</p><p>Imagine that you are just trying to live your life. However, terrorists constantly fire rockets at your hometown. Now imagine that you are a child. And when ...</p><p>youtube.com</p></div></div><div><div>12:10 PM - 26 Jul 2014</div><div><div>44 Retweets 17 Likes</div><div></div></div><div><div>12 44 17</div></div></div></div></div><div><div><div><div><div></div><div>Israel Foreign Min. </div></div><div><div>@IsraelMFA</div><div><div>Follow</div><div></div></div></div></div><div><p>#IsraelUnderFire-The range of Hamas rockets fired at Israel from #Gaza.6 million Israelis under threat of rocket fire</p><div><div><div><div><div><p><b>The Expanding Rocket Threat</b></p><p>Scale: 0, 1,000,000</p></div><div></div></div></div><div><div>7:37 AM - 26 Jul 2014</div><div><div>106 Retweets 38 Likes</div><div></div></div><div><div>18 106 38</div></div></div></div></div></div></div></div></div> |             |


**Israel Foreign Min.** ✓  
@IsraelMFA Follow


**The Expanding Rocket Threat**

Scale: 1:1,000,000

Legend:

- The Expanding Rocket Threat:
- Operation Cast Lead - 2008
- Operation Pillar of Defense - 2012
- Operation Protective Edge - 2014
- Range of Rocket

100 Retweets 38 Likes

18 106 38

| Category    | Content                                                                                                                                                                                                                                                                                               | Example # 1                                                                                                                                                                                                                                                                                                                                                                                                                                                                                                                                                                                                        | Example # 2                                                                                                                                                                                                                                                                                                                                                                                                                                                                                                                                                                                                                                                                                                                                                                                                                                                                                                                 |
|-------------|-------------------------------------------------------------------------------------------------------------------------------------------------------------------------------------------------------------------------------------------------------------------------------------------------------|--------------------------------------------------------------------------------------------------------------------------------------------------------------------------------------------------------------------------------------------------------------------------------------------------------------------------------------------------------------------------------------------------------------------------------------------------------------------------------------------------------------------------------------------------------------------------------------------------------------------|-----------------------------------------------------------------------------------------------------------------------------------------------------------------------------------------------------------------------------------------------------------------------------------------------------------------------------------------------------------------------------------------------------------------------------------------------------------------------------------------------------------------------------------------------------------------------------------------------------------------------------------------------------------------------------------------------------------------------------------------------------------------------------------------------------------------------------------------------------------------------------------------------------------------------------|
| Good Israel | Tweets depicting Israeli aid convoys to Gaza, demonstrating Israelis sheltering one another from rockets, detailing Israeli humanitarian windows, depicting Israel's field hospital near Gaza, detailing Israel's attempt to limit loss of life, detailing Israel's acceptance of ceasefire proposals | <div data-bbox="893 245 1366 963">  Israel Foreign Min.  @IsraelMFA  <p>While Hamas is using #Gaza civilians as human shields, Israel makes every effort to protect its civilians.</p>  <p>4:10 AM - 16 Jul 2014</p> <p>197 Retweets 54 Likes</p> <p>25 197 54</p> </div> | <div data-bbox="1496 245 2011 639">  Israel Foreign Min.  @IsraelMFA  <p>As much as Israel makes efforts to avoid civilian casualties in #Gaza, Hamas intentionally endangers their lives</p> <div data-bbox="1505 405 2011 520">  <p>Documented: Hamas' Human Shields and Israel's Humanita...<br/>Hamas uses the civilian population of Gaza as human shields for its terrorist activities. Rockets are stored in schools and terrorists flee in ambulance. Pri...<br/>youtube.com</p> </div> <p>5:40 PM - 25 Jul 2014</p> <p>56 Retweets 18 Likes</p> <p>14 56 18</p> </div> |

| Category            | Content                                                                                                                                                                                                                                           | Example # 1                                                                         | Example # 2                                                                          |
|---------------------|---------------------------------------------------------------------------------------------------------------------------------------------------------------------------------------------------------------------------------------------------|-------------------------------------------------------------------------------------|--------------------------------------------------------------------------------------|
| Blame Hamas         | Tweets detailing Hamas military attacks on Israel, depicting Hamas military capabilities, demonstrating Hamas firing from populated areas, detailing Hamas calls on citizens not evacuate areas before aerial bombardments                        |   |   |
| Hamas Human Shields | Tweets illustrating Hamas' use of civilians as human shields, depicting rocket fire from residential areas, depicting Gazans standing on the roofs of buildings so as to prevent attacks and cartons depicting Hamas' use of children as shields, |  |  |

| Category            | Content                                                                                                                                                                                    | Example # 1                                                                         | Example # 2                                                                         |
|---------------------|--------------------------------------------------------------------------------------------------------------------------------------------------------------------------------------------|-------------------------------------------------------------------------------------|-------------------------------------------------------------------------------------|
| Military Operations | Tweets explaining Israel's military goals, depicting soldiers aborting missions due to civilian presence, describing military achievements                                                 |   |  |
| Invoking Morality   | Tweets that offer moral or value-based judgments, that invoke terms such as "good", "barbaric" or "evil", that deal with norms that governments should adhere to or that depict war crimes |  |  |

| Category              | Content                                                                                                                                                                               | Example # 1                                                                         | Example # 2                                                                          |
|-----------------------|---------------------------------------------------------------------------------------------------------------------------------------------------------------------------------------|-------------------------------------------------------------------------------------|--------------------------------------------------------------------------------------|
| International Support | Tweets depicting official state visits, describing shows of support from foreign governments and leaders, detailing international support for Israel in diplomatic forums             |   |   |
| Ceasefire             | Tweets depicting Hamas' violations of ceasefire proposals, Hamas' lack of adherence with ceasefires and Israel's acceptance and adherence with all ceasefire proposal and initiatives |  |  |

| Category      | Content                                                                                                                                                                                 | Example # 1                                                                         | Example # 2                                                                          |
|---------------|-----------------------------------------------------------------------------------------------------------------------------------------------------------------------------------------|-------------------------------------------------------------------------------------|--------------------------------------------------------------------------------------|
| Hamas Tunnels | Tweets depicting Hamas' tunnels, describing Hamas' use of tunnels, illustrating threat that tunnels pose to Israeli cities and citizens                                                 |   |   |
| US Support    | Tweets describing shows of support from US diplomats, leaders and politicians, depicting statements of support by US officials and detailing statements of support from US institutions |  |  |



| Category                | Content                                                                                                                                                                                                                                   | Example # 1                                                                          | Example # 2                                                                           |
|-------------------------|-------------------------------------------------------------------------------------------------------------------------------------------------------------------------------------------------------------------------------------------|--------------------------------------------------------------------------------------|---------------------------------------------------------------------------------------|
| Criticising UN          | Tweets dealing with Israel's rejection of UN criticism, describing UN "double standards", denouncing UN forums for singling Israel out, depicting UN hypocrisy and illustrating Hamas use of UN facilities to hide rockets and operatives |   |    |
| Shared Threat of Terror | Tweets describing Hamas as a radical Islamic group, associating Hamas with Boko Haram and ISIS, depicting Israel as being at the forefront of a global struggle against terror                                                            |  |  |

| Category           | Content                                                                                                                                                                                                                                           | Example # 1                                                                        | Example # 2                                                                         |
|--------------------|---------------------------------------------------------------------------------------------------------------------------------------------------------------------------------------------------------------------------------------------------|------------------------------------------------------------------------------------|-------------------------------------------------------------------------------------|
| Humanising Victims | Tweets depicting lives of Israelis under rocket attacks, depicting the vulnerability of children to rocket attacks, demonstrating the fear of parents and teacher from impending attacks and depicting civilians running for shelter from rockets |  |  |
